1 **Septoria tritici blotch resistance gene *Stb15* encodes a lectin receptor-like kinase**

2 **Amber N. Hafeez**<sup>1</sup>, Laetitia Chartrain<sup>1</sup>, Cong Feng (奉聰)<sup>2</sup>, Florence Cambon<sup>3</sup>, Martha  
3 Clarke<sup>1</sup>, Simon Griffiths<sup>1</sup>, Sadiye Hayta<sup>1</sup>, Mei Jiang (蒋梅)<sup>2</sup>, Beat Keller<sup>4</sup>, Rachel Kirby<sup>1</sup>,  
4 Markus C. Kolodziej<sup>4</sup>, Oliver R. Powell<sup>1</sup>, Mark Smedley<sup>1</sup>, Burkhard Steuernagel<sup>1</sup>, Wenfei  
5 Xian (洗文飞)<sup>2</sup>, Luzie U. Wingen<sup>1</sup>, Shifeng Cheng (程时锋)<sup>2</sup>, Cyrille Saintenac<sup>3</sup>, Brande B. H.  
6 Wulff<sup>5,6,1</sup>, James K. M. Brown<sup>1</sup>

7

8 <sup>1</sup>John Innes Centre, Norwich Research Park, Norwich, United Kingdom

9 <sup>2</sup>Agricultural Genomics Institute at Shenzhen (AGIS), Chinese Academy of Agricultural  
10 Science (CAAS), China

11 <sup>3</sup>Université Clermont Auvergne, INRAE, GDEC, Clermont-Ferrand, France

12 <sup>4</sup>Department of Plant and Microbial Biology, University of Zürich, Zollikerstrasse 107, CH-  
13 8008 Zürich, Switzerland

14 <sup>5</sup>Plant Science Program, Biological and Environmental Science and Engineering Division  
15 (BESE), King Abdullah University of Science and Technology (KAUST), Saudi Arabia

16 <sup>6</sup>Center for Desert Agriculture, KAUST, Saudi Arabia

17 **Abstract**

18

19 Septoria tritici blotch (STB), caused by the Dothideomycete fungus *Zymoseptoria tritici*, is of  
20 one of the most damaging diseases of bread wheat (*Triticum aestivum*)<sup>1</sup> and the target of  
21 costly fungicide applications<sup>2</sup>. In line with the fungus' apoplastic lifestyle, STB resistance  
22 genes isolated to date encode receptor-like kinases (RLKs) including a wall-associated  
23 kinase (*Stb6*) and a cysteine-rich kinase (*Stb16q*)<sup>3,4</sup>. Here, we used genome-wide association  
24 studies (GWAS) on a panel of 300 whole-genome shotgun-sequenced diverse wheat  
25 landraces (WatSeq consortium) to identify a 99 kb region containing six candidates for the  
26 *Stb15* resistance gene. Mutagenesis and transgenesis confirmed a gene encoding an  
27 intronless G-type lectin RLK (LecRK) as *Stb15*. The characterisation of *Stb15* exemplifies the  
28 unexpected diversity of RLKs conferring *Z. tritici* resistance in wheat.

## 29 Main

30

31 The domestication of wheat 10,000 years ago heralded the dawn of modern agriculture in  
32 western Eurasia<sup>5</sup> whilst providing an opportunity for the specialisation of an uninvited  
33 guest: the fungal pathogen *Zymoseptoria tritici*<sup>6</sup>. Understanding and bolstering genetic  
34 resistance could aid in reclaiming ~24 million tonnes of yield lost to STB each year<sup>1,7</sup>.

35

36 During its interaction with wheat, *Z. tritici* colonises the apoplast through the stomata and  
37 commences a period of asymptomatic growth wherein effectors are released: molecules that  
38 suppress host defences or make the host amenable to colonisation<sup>8</sup>. Host resistance proteins  
39 may directly or indirectly recognise these effectors and modulate defence responses,  
40 described in apoplastic interactions as effector-triggered defence or the 'invasion model'<sup>9-11</sup>.  
41 If undetected, the pathogen switches to its necrotrophic life stage, resulting in the release of  
42 host nutrients and the rapid growth and proliferation of the pathogen<sup>12</sup>. Symptoms  
43 ultimately manifest as necrotic lesions on the leaf surface containing pycnidia (asexual  
44 fruiting bodies), which produce conidia that may disperse up to one metre by rain splash,  
45 allowing further cycles of colonisation and thus quick progress of the disease<sup>13</sup>.

46

47 Twenty-three major genes controlling isolate-specific resistance to STB (*Stb* genes) have been  
48 mapped in wheat<sup>14-16</sup>, but *Stb* gene cloning has lagged behind efforts for other wheat  
49 diseases. *Stb6* on chromosome 3AS, conferring race-specific resistance to *Z. tritici*<sup>3,17</sup> encodes  
50 a wall-associated receptor kinase (WAK), a subfamily within the receptor-like kinase (RLK)  
51 family in plants, with a galacturonan-binding domain<sup>3</sup>. *Stb16q* on chromosome 3D<sup>18</sup> encodes  
52 a cysteine-rich receptor kinase (CRK) with two DUF26 domains<sup>4</sup>. Thus, the two *Stb* genes  
53 cloned to date encode RLKs with extracellular domains which have a putative sugar-  
54 binding function. *Stb15* is a major gene for resistance to *Z. tritici* isolate IPO88004, mapped to  
55 a 36 cM region in the cultivar Arina<sup>19</sup>. It is a good candidate for cloning due to its large  
56 phenotypic effect resulting in full resistance, which is rare amongst *Stb* genes<sup>14</sup>, and is  
57 important due to its presence across the breadth of European wheat cultivars<sup>20</sup>.

58

59 Here we apply genome-wide association studies (GWAS) to map resistance to STB in the  
60 diverse Watkins collection of pre-Green Revolution wheat landraces, which provides the  
61 opportunity to study interactions with STB in a well-adapted yet highly genetically diverse  
62 context<sup>21,22</sup>. GWAS harnesses naturally-occurring population structures in collections of  
63 accessions representing the genetic and phenotypic diversity of a species<sup>7,23</sup>. Well-curated  
64 and sequence-configured panels can be tested for correlations with multiple phenotype  
65 datasets to potentially map many genes from a single population. For a truly unbiased  
66 approach, whole-genome shotgun (WGS) sequencing can be employed to access the entire  
67 genetic diversity of a panel. Sequence reads can then be aligned to a reference genome and  
68 the resulting SNP calls used for GWAS.

69

70 STB symptoms elicited by the *Z. tritici* isolates IPO323, avirulent to *Stb6*<sup>17</sup>, and IPO88004,  
71 avirulent to *Stb15*<sup>19</sup>, were scored across 300 Watkins landraces (**Fig. 1a**). This core panel was  
72 selected to maximize genetic representation<sup>24</sup>. Leaf damage (necrosis and chlorosis), and  
73 pycnidial coverage are usually, but not always, correlated<sup>25</sup>. Both phenotypes were recorded

74 at 5-6 timepoints for calculation of the area under the disease progress curve (AUDPC),  
75 followed by logit transformation and linear mixed modelling (**Supp. Tables 1-4**).

76

77 A SNP matrix generated from WGS sequencing data of wheat cultivars and landraces was  
78 mapped to Chinese Spring and employed for GWAS (WatSeq consortium). As a positive  
79 control to ensure the suitability of the experimental system for mapping via this method,  
80 *Stb6* was successfully restricted to a discrete genomic interval in the core Watkins panel. We  
81 screened IPO323 on the Watkins core panel and ten control cultivars (**Supp. Table 5**),  
82 including Chinese Spring which has the functional allele of *Stb6*<sup>3</sup> (**Fig. 1b**). An interval on  
83 chromosome 3A was associated with both leaf damage and pycnidia phenotypes (pycnidia:  
84 **Fig. 1c**; leaf damage: **Supp. Fig. 1**). SNPs in the 3A locus were highly associated with  
85 pycnidia, with a  $-\log_{10} p$ -value of almost 30. Within this region, a linkage disequilibrium (LD)  
86 block extending from 26.10 to 27.50 Mb was identified. A smaller haploblock within it was  
87 most highly associated with resistance, from 26,035,170 to 26,238,727 bp (**Supp. Fig. 2**). This  
88 203.6 kb region contained six genes, including *Stb6* (**Fig. 1c**).

89

90 We then proceeded to identify *Stb15* by inoculating the panel with IPO88004 and employing  
91 GWAS. Several regions were associated with STB phenotypes (pycnidia: **Fig. 1c**; leaf  
92 damage: **Supp. Fig. 3**). A locus on 6AS had the highest  $p$ -value for both pycnidia and  
93 damage traits and spanned a 99.1 kb region between 485,503,26 and 485,994,21 bp  
94 containing six genes. Comparison of gene sequences between Arina*LrFor* and Chinese  
95 Spring combined with correlation of haplotypes with the responses of landraces to IPO88004  
96 excluded five of these genes (**Supp. Table 6**; **Supp. Fig. 4**). The remaining gene,  
97 TraesCS6A02G078700/TraesARI6A03G03215890, is predicted to encode an RLK and is  
98 strongly associated with isolate-specific resistance to IPO88004 (**Fig. 1b**), so was selected as  
99 the most likely candidate for *Stb15*.

100

101 We also observed a significant association of pycnidia cover of IPO88004 with a locus on  
102 chromosome 2BL which spanned 755 to 775 Mb and contained 241 genes. When we  
103 removed the masking effect of lines carrying *Stb15*, the significance of the 2BL resistance  
104 increased one-thousand-fold (**Supp. Fig. 5**). *Stb9* has previously been mapped to 2BL<sup>26</sup> but is  
105 outside of this locus (at ~808 Mb)<sup>27</sup> and accessions which display resistance to IPO89011, an  
106 isolate which is avirulent on *Stb9*, are not always resistant to IPO88004<sup>20,28</sup> (**Supp. Table 7**).  
107 Therefore, the LD block appears to be a novel locus for resistance to *Z. tritici*, temporarily  
108 designated as *STBWat1*.

109

110 TraesCS6A02G078700/TraesARI6A03G03215890 was confirmed as *Stb15* by a combination  
111 of mutagenesis and transgenesis and shown to be a lectin receptor kinase (LecRK). We  
112 screened 3,308 plants from 307 M2 families of an EMS-derived mutant population of cv.  
113 Arina for resistance to IPO88004 and identified three independent susceptible mutants (**Fig.**  
114 **2a,b**). All three of these mutant plants had one non-synonymous transition mutation in the  
115 open reading frame of the *Stb15* candidate. The gene encodes a G-type lectin receptor kinase  
116 (LecRK)<sup>29</sup> with an intracellular serine/threonine receptor-like protein kinase (S/TPK) and  
117 three extracellular domains: a mannose-specific bulb-type lectin (BTL), an S-locus  
118 glycoprotein (SLG), and a plasminogen/apple/nematode (PAN) domain. All three of the

119 induced mutations resulted in replacement by larger amino acids in the BTL and kinase  
120 domains. In an AlphaFold model (**Fig. 2c**), all three residues were in locations where  
121 mutations would be predicted to cause disruption to the protein structure. To confirm the  
122 function of the candidate gene we synthesized a 10.9 kb genomic sequence containing 2 kb  
123 and 1.5 kb of 5' and 3' regulatory sequence from Arina into a binary vector and transformed  
124 wheat cv. Fielder, which is susceptible to isolate IPO88004. We obtained two independent  
125 homozygous single-copy T<sub>2</sub> transgenic lines which conferred resistance to IPO88004  
126 whereas their respective nulls were susceptible, indicating that the isolated gene sequence is  
127 sufficient to confer the *Stb15* phenotype (**Fig. 2d**; **Supp. Table 8-9**). Transgenic lines with  
128 four and six to eight copies of *Stb15* were also resistant relative to the controls.

129

130 The functional allele of *Stb15* is present across the geographic (**Fig. 3a**) and genetic (**Fig. 3b**)  
131 diversity of the Watkins core 300 collection, although it occurs in only 15% of landraces. It is  
132 often present alongside *Stb6*, which is more common (78%). Alleles were defined based on  
133 SNP distance (**Supp. Fig. 4**; **Supp. Table 10-11**). 14% of landraces displayed resistance to *Z.*  
134 *tritici* which could not be explained by either gene. Unexplained resistance to IPO88004 (36  
135 landraces) could be due to *STBWat1* (**Fig. 1c**). *Stb15* is also present in 35% of European  
136 cultivars tested using KASP markers (**Supp. Table 12**).

137

138 Forty-eight proteins from 16 Poaceae species shared homology with the Arina/ArinaLrFor  
139 *Stb15* protein (**Supp. Fig. 6**; **Supp. Table 13**). Homologous genes encoding the protein  
140 sequences were found to be conserved across the Group 6 chromosomes within the Triticeae  
141 (**Fig. 3c**), but were also present on other chromosomes, especially Groups 3, 4 and 7 (**Supp.**  
142 **Fig. 6**).

143

144 We detected intron/exon structural diversity in gene annotations of proteins with homology  
145 to *Stb15* across the Poaceae, including within *T. aestivum* (**Fig. 3c**). The functional allele of  
146 *Stb15* is intronless, whilst in cv. Chinese Spring, lacking the *Stb15* phenotype, the gene has  
147 four introns. An intronless gene structure was also observed in gene annotations of 22  
148 homologous proteins both within the Triticeae tribe (*Triticum*, *Aegilops* and *Hordeum*) and  
149 beyond it (*Brachypodium* and *Avena*), especially on Group 3 and 6D/6S chromosomes. *Stb15*  
150 clustered most closely to the Chinese Spring 6D and *Aegilops bicornis* 6S homologs,  
151 suggesting that the functional allele of *Stb15* may have originated from the D or S genomes,  
152 which share high sequence homology<sup>30</sup>.

153

154 Within the inner *Stb15* clade, the kinase and PAN domains were highly conserved whilst the  
155 region spanning the BTL and SLG domains was variable (**Fig. 3d**), suggesting it may be  
156 under diversifying selection.

157 Characterisation of the third *Stb* gene from a distinct subclass of the RLK protein family has  
158 the potential to enhance molecular understanding of the wheat-*Z. tritici* interaction,  
159 providing new opportunities for research and disease control. In addition, this research  
160 demonstrates the power of GWAS to greatly accelerate gene cloning for traits which are  
161 poorly understood at the molecular level. One of the factors that may limit the success of  
162 GWAS is population structure<sup>31</sup>. In this study, the presence of *Stb15* and *Stb6* in Watkins  
163 landraces that spanned the breadth of the genetic diversity of the panel was likely decisive  
164 to their successful mapping (Fig. 3a,b). Such wide distributions of allelic variation across the  
165 full range of relevant germplasm allow the effects of genes of interest to be separated from  
166 those of kinship. Such a distribution may be more likely for genes which were introduced  
167 early into cultivated hexaploid wheat, which appears to be the case of *Stb6* known from both  
168 Europe and East Asia<sup>32</sup>. Likewise, Watkins lines with *Stb15* were obtained across the  
169 breadth of Eurasia as well as North Africa.

170  
171 The diversity of intron/exon gene structures amongst *Stb15* homologs is unusual when  
172 compared to nucleotide-binding leucine-rich repeats (NLRs) for which gene structures tend  
173 to be conserved<sup>33</sup>. Leucine-rich repeat membrane-anchored proteins without intracellular  
174 kinases control resistance to the related Dothidiomycete fungus *Cladosporium fulvum*, the  
175 causal agent of leaf mold in tomato<sup>34</sup>, many of which<sup>35</sup> share the intronless open reading  
176 frame exhibited by the functional allele of *Stb15*. Possibly, intronless gene structures have  
177 been conserved whilst intron gain has occurred in e.g. the Chinese Spring allele.

178  
179 *Stb15* has more extracellular domains compared to *Stb6* and *Stb16q*, and the diversity of RLK  
180 subclasses conferring resistance is unusual compared to *Cf* genes but similar to genes  
181 conferring resistance to blackleg disease in *Brassica* spp.<sup>36,37</sup>. Equally, there are similarities  
182 shared by *Stb* proteins: they are transmembrane proteins with extracellular domains with a  
183 putative sugar-binding function and an intracellular kinase. Both the DUF26 domains of  
184 *Stb16q* and the G-type lectin domain of *Stb15* likely bind mannose, a building block of  
185 mannan found in cell walls of both fungi<sup>38</sup> and wheat<sup>39</sup>. Detection of a conserved PAMP fits  
186 the function of lectins which form part of basal plant immunity and are involved in stomatal  
187 innate immunity responses in *Arabidopsis thaliana*<sup>40</sup>, and LecRKs confer non-host or marginal  
188 host resistance to leaf rust in barley<sup>41</sup>. This role could make *Stb15* a target for suppression by  
189 the pathogen or it could be part of a guard/guardee pair<sup>42</sup>, triggering isolate-specific  
190 resistance. Alternatively, the interaction could resemble that of the tomato receptor Cf-4 and  
191 Avr4, a passive *C. fulvum* effector which binds chitin to avoid breakdown by the host plant<sup>34</sup>.  
192 Another possibility is that *Stb15* binds glycoproteins; AFP1 in maize was previously thought  
193 to bind chitin but in fact interacts with chitin deacetylases, most likely via their  
194 mannosylated group<sup>43</sup>.

195  
196 LecRKs have been found to bind to secreted proteins, e.g. a *Phytophthora* spp. effector<sup>44</sup>,  
197 which may also be the case for *Stb15*. A candidate gene for *AvrStb15* encoding a small  
198 secreted protein (SSP) has been suggested<sup>45</sup>, but further work will be needed to determine  
199 the nature of its interaction with *Stb15*. There is thus far no evidence of a direct interaction  
200 between *Stb6* and *AvrStb6*, also encoding a cysteine-rich SSP<sup>3,46,47</sup>. In conclusion, our study  
201 highlights the importance of elucidating the diverse roles of *Stb-AvrStb* pairs in defence

202 induction for understanding the genetic basis of resistance in this economically important  
203 pathosystem.

204

205

## 206 **Acknowledgements**

207 We thank Cristobal Uauy, Anthony Hall and Manuel Spannagl for pre-publication access to  
208 *ArinaLrFor* RNAseq data and associated genome annotations, Tom O'Hara for sharing  
209 resources, Tjelvar Olsson for Python training and consultation and Sreya Ghosh and Guru  
210 Radhakrishnan for advice on phylogenetics.

211

212 This research was supported by the NBI Research Computing group, the Informatics  
213 Platform and Horticultural Services at the John Innes Centre, UK, the experimental  
214 infrastructure VégéPôle, INRAE, France, and financed by funding from the Biotechnology  
215 and Biological Sciences Research Council (BBSRC) Plant Health (BBS/E/J/000PR9798) and  
216 (BBS/E/J/000PR9780) Designing Future Wheat Strategic Programmes to J.K.M.B. and  
217 B.B.H.W., King Abdullah University of Science and Technology to B.B.H.W and the BBSRC  
218 Doctoral Training Program (DTP) at the Norwich Research Park (NRP) to A.N.H.

219

220

## 221 **Draft of author contributions**

222 Authors are listed in alphabetical order by last name apart from the first three and last four  
223 authors. *Z. tritici* pathology work on Watkins landraces was planned and implemented by  
224 A.N.H, L.C. and R.K. with supervision from J.K.M.B. Statistical analysis of pathology work  
225 was carried out by A.N.H and J.K.M.B. Pre-publication collaboration (within 'WatSeq'),  
226 access to genotyping data and application of GWAS to the project was facilitated primarily  
227 by S.C. alongside S.G. and implemented by L.U.W., C.F., W.X. and M.J., as well as  
228 generation of associated figures and suggestion of candidate genes. A.N.H and B.S. analysed  
229 WatSeq genotypes for allele characterisation and identification of candidate genes. Cloning  
230 strategy was conceived and planned by B.B.H.W. An *Arina* EMS mutant population was  
231 generated by M.C.K. in the labs of B.K. Large-scale screens were planned and implemented  
232 by C.S. and F.C, along with identification and resequencing of induced susceptible mutants  
233 and provision of phenotype images. O.R.P. generated and annotated the AlphaFold model  
234 of *Stb15*. M.S. designed a vector carrying *Stb15* which was transformed into wheat by S.H.  
235 and M.C., followed by SSD to T<sub>2</sub> and screening with *Z. tritici* by L.C. and A.N.H. and  
236 statistical analysis by J.K.M.B. Study of *Stb15* homologs and gene structural variation was  
237 conducted by A.N.H. Composite figures were designed by A.N.H., B.B.H.W. and J.K.M.B.  
238 and generated by A.N.H. A.N.H drafted the manuscript with extensive input and revisions  
239 from B.B.H.W., J.K.M.B. and C.S. Further revisions to the manuscript were contributed by  
240 B.K., M.C.K., L.C., S.H., M.S., C.F. and M.J.

241

242

## 243 **Competing interests**

244 The authors declare no competing interests.

245

246

## 247 **Materials and Methods**

### 248 *Plant and pathogen material*

249 Of the total 826 lines in the Watkins collection, we used a core set of 300 lines representing  
250 the majority of genetic variation present in spring growth types<sup>24</sup>. Wheat control lines were  
251 included in all assays, with lines selected based on known response to Septoria or strategic  
252 importance (**Supp. Table 5**). Both Arina and ArinaLrFor were used for analyses or  
253 experiments pertaining to *Stb15* as they carry the same allele. ArinaLrFor is a genotype  
254 derived from a cv. Arina x cv. Forno cross and further backcrossing with Arina<sup>48</sup>, where cv.  
255 Forno is susceptible to IPO88004, so the resistance in ArinaLrFor should come from the  
256 Arina allele of *Stb15*. Seeds of wheat cultivar ArinaLrFor (PANG0001) are available from the  
257 Germplasm Resources Unit, John Innes Centre, Norwich, UK  
258 (<https://www.jic.ac.uk/research-impact/germplasm-resource-unit/>). The *Z. tritici* isolates  
259 IPO323 (virulent on *Stb6*) and IPO88004 (virulent on *Stb15*) were used due to known  
260 avirulence to *Stb6*<sup>3,17</sup> and *Stb15*<sup>19</sup>, respectively. IPO323 was isolated in 1981 in The  
261 Netherlands<sup>49</sup> whilst IPO88004 was isolated in Ethiopia in 1988<sup>50</sup>. A third isolate, IPO90012  
262 from Mexico<sup>51</sup>, was also included for comparison as a virulent control isolate.

263

### 264 *Design and infection protocol for pathology assays at JIC*

265 An alpha lattice design was used for the pathology experiments which consisted of five  
266 replicates across incomplete blocks (40-well seedling trays). This allowed the effects of tray  
267 and position in the controlled environment room (CER) to be estimated through statistical  
268 analysis. The design was generated using the ALPHA setting of the Gendex programme  
269 (<http://designcomputing.net/gendex/>) based on the design principles of Patterson and  
270 Williams (1976)<sup>52</sup>.

271

272 The following methods are based on those described by Arraiano et al. (2001)<sup>53</sup>, which in  
273 turn followed the methods of Kema et al.<sup>50</sup>. Multiple seeds of the lines tested were pre-  
274 germinated in Petri dishes on filter paper (Whatman 90 mm, Whatman International Ltd,  
275 Hadstone, UK) containing 4 ml of 0.2 ppm gibberellic acid. Petri dishes were placed in the  
276 dark at room temperature for 48 hours, then moved to the lab bench in daylight for a further  
277 24 hours. Germinated seeds were then planted in John Innes peat-based F2 compost in 40-  
278 well trays. Trays were placed in a Conviron controlled environment room with a 16-hour  
279 photoperiod: day temperature 18°C, night temperature 12°C, photosynthetic photon flux  
280 density (PPFD) of 350  $\mu\text{E}/\text{m}^2$  at plant height. When the second leaf was fully expanded,  
281 usually at around 14 days after germination, inoculum was prepared.

282

283 Sporulating cultures of *Z. tritici* were grown on potato dextrose agar (PDA) plates for five to  
284 seven days under near ultra-violet light (Snijders Micro Clima-Series<sup>TM</sup> Economic Lux  
285 Chamber, Snijders Labs, Tilburg, The Netherlands) for 16 h per day at 18°C. Cultures were  
286 then flooded with 3 ml of sterile distilled water and scraped to release conidia. The  
287 concentration of conidial suspension was then adjusted to the desired inoculum  
288 concentration, typically 10<sup>6</sup> spores ml<sup>-1</sup>. Conidial concentration was assessed through the  
289 use of a Fuchs-Rosenthal counting chamber (Hawksley, Lancing, UK). Two drops of



290 polyoxyethylene-sorbitan monolaurate (Tween-20; Sigma-Aldrich Chemie GmbH, Germany)  
291 were added per 50 ml of spore suspension.

292

293 Later-formed leaves were cut away so that only the primary seedling leaf remained.  
294 Seedlings were then evenly sprayed with spore suspension (20 ml per tray), assisted by the  
295 use of a turn table (made at JIC), using a Clarke Wiz Mini Air Compressor spray gun kit  
296 (Clarke Tools, Dunstable, England).

297

298 Trays were placed on matting within propagators, with two trays per propagator. This  
299 allowed trays to be watered from underneath to prevent the inoculum from washing off.  
300 The propagators were closed and covered with a black plastic bag for dark incubation. Black  
301 bags were removed after 48 hours and propagator lids were kept over trays until seven days  
302 after inoculation to increase humidity and therefore the success of infection by *Z. tritici*. New  
303 leaf growth was cut back twice per week to keep the inoculated leaves healthy and facilitate  
304 scoring.

305

306 The percentage of leaf area covered by pycnidia and leaf damage was scored by eye four to  
307 six times at intervals of two to five days over a period of 10 to 32 days post inoculation,  
308 depending on disease progress. Damage was defined as the combined area of necrosis and  
309 chlorosis. For imaging, leaves were mounted on A4 paper and scanned with a Canon LiDE  
310 120 scanner at 600 DPI using the Canon IJ Scan Utility2 software. The standardised A4  
311 image size allowed the dimensions of cropped images to be calculated using Adobe  
312 Illustrator.

313

#### 314 *Statistical analysis*

315 The area under the disease progress curve (AUDPC) was calculated for each dataset by  
316 calculating the area of the trapezium formed between each pair of scoring days on a graph  
317 of disease severity over time. The data were analysed for the effects of line, isolate and  
318 experimental design factors using linear mixed modelling to account for both random and  
319 fixed effects, via the package lmerTest<sup>54</sup> in R version 4.2.2. If only fixed effects were  
320 involved, the native R analysis of variance aov() function was used. Nested deviance tests  
321 were conducted to determine the most concise fixed models that explained as much of the  
322 variation in phenotype as possible. The quality of models was assessed by residual plots.  
323 Models were fitted to the percentage of the maximum possible AUDPC but if the residual  
324 plots indicated non-normality or heteroscedasticity, AUDPC was transformed by the  
325 empirical logit transformation using the smallest possible AUDPC value score as a  
326 coefficient to avoid logarithms of zero<sup>55,56</sup>. Generally, it was possible to analyse damage data  
327 on the original percentage scale, whereas pynicial coverage usually required logit  
328 transformation. The estimated mean pycnidia and damage scores for each genotype were  
329 obtained through the R emmeans<sup>57</sup> package. These calculations were performed in R<sup>58</sup>  
330 version 4.2.2.

331

#### 332 *Genome-wide association study from Watkins collection*

333 The markers used for GWAS of Watkins collection were ~10 Mb core SNPs generated from  
334 whole genome shotgun sequencing of accessions and alignment to Chinese Spring. Extreme

335 outlier values of phenotypic data were removed. In addition, we calculate kinship matrix as  
336 the covariate using GEMMA-kin. Based on these, we performed GWAS using GEMMA  
337 (v0.98.1) with parameters (gemma-0.98.1-linux-static -miss 0.9 - gk kinship.txt) and gemma-  
338 0.98.1-linux-static -miss 0.9 -lmm -k kinship.txt). In-house scripts programmed in R were  
339 used to visualize these results.

340

#### 341 *Estimation of haplotypes/alleles of candidate genes*

342 A python script was written to identify the haplotypes of the six candidate *Stb* genes in the  
343 6AS locus. The script parsed variant call format files (VCFs) generated from the alignment of  
344 Watkins and wheat lines to Chinese Spring (see above). This produced a matrix of distances  
345 between all accessions which could be used to determine haplotype groups. The R package  
346 pheatmap<sup>59</sup> was used to generate heatmaps arranged in dendrograms from distance  
347 matrices, including associated phenotype data. Various iterations of the VCF parsing script  
348 described above were run and plotted in order to identify the most useful variation for  
349 haplotype calling. Ultimately, the whole gene sequence was analysed (rather than, for  
350 example, exons alone). The dendrogram produced was manually analysed to estimate the  
351 number of haplotype groups present. Clusters were then estimated using the cutree function  
352 in pheatmap and examined; several iterations were performed to determine the number of  
353 clusters/haplotypes which were most informative, particularly for explaining phenotypes.  
354 This method was used to determine which Watkins landraces carry the functional Arina  
355 allele of the *Stb15* candidate as well as the functional Chinese Spring allele of *Stb6*.

356

#### 357 *Generation of figures presenting Stb gene alleles in the Watkins collection*

358 Figures wherein *Stb* gene alleles were plotted (1a, 3a-b) were generated in R using ggplot2<sup>60</sup>  
359 and cowplot<sup>61</sup>. For Figure 3a, the R package ggmap<sup>62</sup> was implemented for generating the  
360 map and plotting coordinates.

361

362 A principal components analysis (PCA) was conducted in R version 4.2.2 using the package  
363 vcfR<sup>63</sup> to process the WatSeq VCF data for *Stb15*, the base R prcomp function to compute the  
364 PCA and the vegan<sup>64</sup> package for further analysis.

365

366 Composite main figures and illustrations were generated in Adobe Illustrator 2023.

367

#### 368 *Identification of candidate Stb genes by bioinformatics*

369 Candidate Septoria resistance genes were identified by selecting the most likely candidate  
370 from the genes in the LD block most highly associated with Septoria response. A number of  
371 factors were considered, such as: the SNP *p*-value (for association with Septoria response),  
372 gene class, the presence of differential SNPs between susceptible and resistant wheat  
373 varieties, and the strength of correlation of predicted resistant haplotypes with STB  
374 responses (described above).

375

376 To further confirm the *Stb15* candidate bioinformatically, a second iteration of the GWAS  
377 was run with lines carrying predicted functional alleles of the candidate gene removed. This  
378 resulted in the loss of the association of the 6AS locus with resistance, implying that the lines  
379 that were removed did contain the 6AS resistance.

380

381 *Generation of an Arina EMS population*

382 Generation of the Arina EMS population is as described in Kolodziej et al. (2021)<sup>48</sup>. EMS  
383 mutagenesis of cv. Arina was performed with a concentration of 0.6% and 0.45% EMS  
384 (Sigma Aldrich, St. Louis, Missouri, USA), respectively. Seeds were incubated for 16 h in  
385 water at 4 °C, dried for 8 h on filter paper, and incubated for 16 h with shaking at room  
386 temperature in EMS solution. After washing three times for 30, 45, and 60 min, respectively,  
387 and for another 30 min under running tap water, seeds were pre-germinated on humid filter  
388 paper. Three thousand seeds of BC2F5-85 were mutagenized and pre-germinated seeds  
389 were propagated in the field. Single spikes of M0 plants were harvested and M1 plants were  
390 grown and harvested in the field.

391

392 *Validation of the Stb15 candidate through screening an Arina EMS population*

393 When available, 12 seeds per M<sub>2</sub> family were sown in a mixture of 1/2 blond and 1/2 brown  
394 peat mosses (Humustar soil, NPK 14-16-18, SARL Activert, Riom, France) and kept at 6°C  
395 for 4 days. Subsequently, the plants were cultivated in a growth chamber equipped with  
396 sodium lamps (HQI-TS 250W/D UVS FC2 FLH1, intensity = 300 μmol m<sup>-2</sup> s<sup>-1</sup>) under a  
397 photoperiod of 16 h of light, a temperature of 21°C/18°C (day/night), and a relative  
398 humidity of 85%. Fourteen days after sowing, the plants were inoculated by spraying them  
399 with a hand sprayer (Elyte 2, Berthoud) with *Z. tritici* isolate IPO88004. The plants were  
400 covered with plastic bags for 3 days before returning to normal conditions. Visual  
401 evaluations were conducted at 21 and 28 days post-inoculation (dpi). All M<sub>2</sub> plants carrying  
402 pycnidia were self-pollinated. M<sub>3</sub> plants were evaluated for resistance to isolate IPO88004,  
403 following the procedure described above, with the exception that inoculations were  
404 performed on six-centimeter sections in the middle of the second leaf using a paintbrush.  
405 Three plants per M<sub>3</sub> family were inoculated during two independent experiments. The *Z.*  
406 *tritici* inoculum was prepared using YG and YPD media following the procedure described  
407 in Battache et al.<sup>28</sup>. Inoculation with concentrations of 1 × 10<sup>6</sup> spores/ml and 1 × 10<sup>7</sup>  
408 spores/ml, supplemented with 0.05% (v/v) Tween-20 were used for inoculating M<sub>2</sub> and M<sub>3</sub>  
409 plants, respectively. The *Stb15* candidate gene was sequenced from each susceptible M<sub>3</sub>  
410 plant using Sanger sequencing following PCR amplification using primer pairs  
411 Stb15F1/Stb15R1 and Stb15F3/Stb15R3 and the Phusion High-Fidelity Master Mix.

412

413 Primers:

414 Stb15F1: TCCTACTACTAGCCAAGCATGTC

415 Stb15R1: GCCATTGCCGTTAGAAACAG

416 Stb15F3: CTGTTCGAGGGAGGTTCCTA

417 Stb15R3: GTGCAAAGACCGCAGTATGT

418

419 *Design of the Stb15 binary vector construct*

420 A wheat transformation vector was assembled using standard Golden Gate MoClo assembly  
421 (Werner et al., 2012) and traditional digestion and ligation cloning. The level 1 plasmids  
422 pL1P1R *PvUbiP:hpt-int:35sT* selection cassette, pICH47742 L1P2 MCS & LacZ (Addgene  
423 #48001), and pL1P3ZmUbiP:GRF-GIF:NosT (Addgene #198047) were assembled into the  
424 Level 2 acceptor pGoldenGreenGate-M (pGGG-M) (Addgene #165422) binary vector

425 (Smedley et al., 2021) along with end linker pELE-3 (Addgene #48018). The resulting plasmid  
426 was deemed pGGG L2 PvUH GGLacZ GRF-GIF. The *Stb15* gene sequence was analysed  
427 using the software Geneious Prime version 2020.2.4 (Biomatters) and two restriction enzymes  
428 (*SbfI* and *SacI*) were chosen for digestion/ligation cloning. The sequence containing the *Stb15*  
429 gene (6077 bp), consisting of 1,917 bp promoter, 136 bp 5'UTR, 2,290 bp CDS, 306 bp 3'UTR  
430 and 1,404 bp terminator, was synthesised (Invitrogen, Thermofisher Scientific) with restriction  
431 enzyme recognition sites *SbfI* and *SacI* added to the 5' and 3' ends, respectively. The *Stb15*  
432 gene synthon was cloned into pGGG L2 PvUH GGLacZ GRF-GIF within the multiple cloning  
433 site (MCS) using *SbfI* and *SacI* digestion/ligation. The resulting plasmid was named pGGG  
434 L2 *TaStb15* and was electroporated into the hypervirulent *Agrobacterium* strain AGL1 (Lazo et  
435 al.,1991) as previously describe by Hayta et al., (2019).

436

437 *Agrobacterium transformation of T. aestivum cv. 'Fielder'*

438 Wheat transformation was performed as previously published by Hayta et al., (2021) with  
439 slight modification. The construct incorporated the GRF4-GIF1 technology (Debernardi et al.,  
440 2020). Briefly, wheat cv. 'Fielder' was grown in a controlled environmental room under a long-  
441 day photoperiod (16 h at 600  $\mu\text{mol m}^{-2} \text{s}^{-1}$  light, at 20 °C day and 16 °C night). Wheat spikes  
442 were collected ~14 days post anthesis (early milk stage GS73) when the immature embryos  
443 were 1-1.5 mm in diameter. Under aseptic conditions, immature embryos were isolated from  
444 surface sterilised grain.

445 The isolated immature embryos were pre-treated by centrifugation in liquid medium prior to  
446 *Agrobacterium* inoculation. The embryos were transferred to co-cultivation medium, scutellum  
447 side up, and incubated at 24 °C in the dark for 3 days co-cultivation. The embryogenic axes  
448 were excised and discarded, before transferring the embryos to wheat callus induction (WCI)  
449 medium without selection for 5 days at 24 °C in the dark. After 5 days, the embryos were  
450 transferred to WCI containing 15 mg L<sup>-1</sup> hygromycin and incubated at 24 °C in the dark.  
451 Subculturing onto fresh WCI with hygromycin selection at 15 mg L<sup>-1</sup> occurred every two  
452 weeks over a 5-week period. For the final, 5<sup>th</sup>, week on WCI the cultures were maintained in  
453 low light conditions at 24 °C. The cultures were transferred onto wheat regeneration medium  
454 (WRM) supplemented with 0.5 mg L<sup>-1</sup> zeatin, and 15 mg L<sup>-1</sup> hygromycin in deep petri dishes  
455 (90 mm diameter × 20 mm) and cultured under full fluorescent lights (100  $\mu\text{M m}^{-2} \text{s}^{-1}$ ) with a  
456 16 h photoperiod. Regenerated plantlets were transferred to De Wit culture tubes (Duchefa-  
457 Biochemie, W1607) containing rooting medium supplemented with 20 mg L<sup>-1</sup> hygromycin.  
458 After approximately 10 days, rooted plants were transferred to soil (John Innes cereal mix in  
459 24CT trays) and acclimatised (Hayta et al., 2019). The transgenic plants were maintained  
460 under the same growing conditions as donor material with a long-day photoperiod (16 h at  
461 600  $\mu\text{mol m}^{-2} \text{s}^{-1}$  light, at 20 °C day and 16 °C night). Transgenesis was confirmed and  
462 transgene copy number analysis performed using Taqman qPCR and probe as described in  
463 Hayta et al., (2019). The values obtained were used to calculate transgene copy number  
464 according to published methods (Livak and Schmittgen, 2001).

465

466 *Experimental validation of the Stb15 transgenics*

467 The experiment to test the effect of the *Stb15* candidate on Septoria leaf blotch symptoms  
468 caused by the *Stb15*-avirulent *Z. tritici* isolate IPO88004 was sown in five 40-well seed trays

469 with two experimental replicates per tray in a randomised design (ten replicates per line).  
470 Conditions and infection protocol were as described for JIC pathology experiments above.  
471 The percentage leaf area covered by lesions containing pycnidia was analysed by linear  
472 mixed modelling of repeated measures. Pycnidial area was logit-transformed to reduce  
473 heteroscedasticity. An antedependence order 1 model of repeated measures of logit  
474 (pycnidial area) at 21, 25, 29 and 32 days post inoculation (DPI) was used with the  
475 individual plant as the experimental subject. The random effect model was Tray (Replicate  
476 within Tray was omitted from the model because it did not cause a significant amount of  
477 random variation) and the fixed effects model was DPI \* (Gene / Line), where the factor  
478 Gene indicates whether a wheat line contains *Stb15* either as the candidate transgene or by  
479 breeding, or alternatively lacks *Stb15*. Statistical analysis was done with Genstat 22nd  
480 edition (VSN International, Hemel Hempstead, UK).

481

#### 482 *Identification of intron-exon structure of Stb15*

483 RNAseq data for *ArinaLrFor* generated by Anthony Hall and Manuel Spannagl was mapped  
484 to *ArinaLrFor* using BWA<sup>65</sup> version 0.7.7 and further processed and indexed via samtools<sup>66</sup>  
485 version 1.2. The alignment was then visualised and intron/exon structure was manually  
486 annotated in IGV version 2.14.0. This was then confirmed by comparison with annotations  
487 generated by Anthony Hall and Manuel Spannagl based on the same RNAseq data.

488

#### 489 *Protein structure prediction of Stb15*

490 The protein structures encoded by the *Stb15* candidate genes in Chinese Spring and Arina were  
491 predicted using AlphaFold (version 2.2.0)<sup>67</sup>. For each protein sequence, the highest-confidence  
492 prediction was selected for further analysis. Each protein sequence was also annotated using  
493 InterProScan<sup>68</sup>. These annotations were visualised on each protein's structures using PyMol (version  
494 2.5.2) and domain boundaries were manually expanded upon to include unannotated amino acid.

495

#### 496 *KASP genotyping of European cultivars*

497 KASP genotyping was carried out as described in Saintenac et al. (2021)<sup>4</sup> on 278 European  
498 wheat cultivars. The marker sequences were as follows:

499 F = GAAGGTGACCAAGTTCATGCTGGTTTCAACTTGCAATATGATC

500 V = GAAGGTCGGAGTCAACGGATTGGTTTCAACTTGCCATATGATT

501 C = AGTGAACCAGGTGCCAAAAC

502

#### 503 *Analyses of sequence evolution*

##### 504 *Identification of potential Stb15 homologs in plants*

505 High-quality reference genome protein annotations of plant species were downloaded  
506 (**Supp. Table 9**). Local blastp databases were generated using command line BLAST<sup>69</sup>  
507 version 2.13.0. The amino acid sequence of the functional *Stb15* allele from *ArinaLrFor*  
508 was used as a query sequence for BLAST searches against protein databases of each  
509 species. The top 30 hits were recovered to ensure that no potential orthologs or paralogs  
510 were missed.

511

##### 512 *Protein alignment*

513 A protein alignment was generated using MUSCLE<sup>70</sup> version 3.8.31 with default settings.  
514 Sequences were removed if they contained large (>350 aa) and divergent insertions  
515 which disrupted the alignment or if they contained less than two of the domains present  
516 in the *ArinaLrFor Stb15* sequence. Multiple splice variants were included if their  
517 predicted amino acid sequence varied.

518

519 *Phylogenetic tree construction and analysis of the Stb15 clade*

520 ModelFinder<sup>71</sup> was used to predict the best evolutionary model for the alignment  
521 (JTT+R10) implemented via IQ-TREE<sup>72</sup> version 1.6.10. Branch supports were obtained  
522 with ultra-fast bootstrap (UFBoot<sup>73</sup>) and tree reconstruction was performed using IQ-  
523 TREE. The least-repetitive clade containing *Stb15* was extracted and sequence  
524 conservation was analysed in Geneious version 2022.2.2. Genome annotations (GFFs) for  
525 each ortholog were used to draw gene structures in R version 4.2.2. For the purpose of  
526 the figures presented (**Fig. 3c** and **Supp. Fig. 5**), all exon annotations for each gene are  
527 presented within a single leaf and splice variants were pruned from the tree. The tree  
528 image was generated using iTOL<sup>74</sup> version 6.

529

530 *Alignment for consensus sequence of inner Stb15 clade*

531 A small alignment of the inner *Stb15* clade was generated by MUSCLE within Geneious  
532 version 2022.2.2. It was noticed that the *Zea mays* homolog  
533 *Zea\_mays\_Zm00001eb119590\_P002* was in fact a tandem duplication containing two  
534 identical sequences of a protein encoding a partial BTL and full SLG, PAN and S/TPK  
535 domains. To reduce disruption of the alignment, one half of this protein sequence was  
536 retained. A screenshot of the consensus chart from the Geneious alignment was used in  
537 **Fig. 3d**.

538 **References**

539

- 540 1. Savary, S. *et al.* The global burden of pathogens and pests on major food crops. *Nat*  
541 *Ecol Evol* **3**, 430–439 (2019).
- 542 2. O’Driscoll, A., Kildea, S., Doohan, F., Spink, J. & Mullins, E. The wheat-Septoria  
543 conflict: a new front opening up? *Trends Plant Sci* **19**, 602–610 (2014).
- 544 3. Saintenac, C. *et al.* Wheat receptor-kinase-like protein Stb6 controls gene-for-gene  
545 resistance to fungal pathogen *Zymoseptoria tritici*. *Nat Genet* **50**, 368–374 (2018).
- 546 4. Saintenac, C. *et al.* A wheat cysteine-rich receptor-like kinase confers broad-spectrum  
547 resistance against *Septoria tritici* blotch. *6* (2021).
- 548 5. Salamini, F., Özkan, H., Brandolini, A., Schäfer-Pregl, R. & Martin, W. Genetics and  
549 geography of wild cereal domestication in the near east. *Nat Rev Genet* **3**, 429–441  
550 (2002).
- 551 6. Stukenbrock, E. H., Banke, S., Javan-Nikkhah, M. & McDonald, B. A. Origin and  
552 domestication of the fungal wheat pathogen *Mycosphaerella graminicola* via  
553 sympatric speciation. *Mol Biol Evol* **24**, 398–411 (2007).
- 554 7. Hafeez, A. N. *et al.* Creation and judicious application of a wheat resistance gene atlas.  
555 *Molecular Plant* vol. 14 1053–1070 Preprint at  
556 <https://doi.org/10.1016/j.molp.2021.05.014> (2021).
- 557 8. Jones, J. D. G. & Dangl, J. L. The plant immune system. *Nature* vol. 444 323–329  
558 Preprint at <https://doi.org/10.1038/nature05286> (2006).
- 559 9. Stotz, H. U., Mitrousis, G. K., de Wit, P. J. G. M. & Fitt, B. D. L. Effector-triggered  
560 defence against apoplastic fungal pathogens. *Trends in Plant Science* vol. 19 491–500  
561 Preprint at <https://doi.org/10.1016/j.tplants.2014.04.009> (2014).
- 562 10. Cook, D. E., Mesarich, C. H. & Thomma, B. P. H. J. Understanding Plant Immunity as  
563 a Surveillance System to Detect Invasion. *Annu Rev Phytopathol* **53**, 541–563 (2015).
- 564 11. Kanyuka, K. & Rudd, J. J. Cell surface immune receptors: the guardians of the plant’s  
565 extracellular spaces. *Curr Opin Plant Biol* **50**, 1–8 (2019).
- 566 12. Kema, G. H. J., Yu, D., Rijckenberg, F. H. J., Shaw, M. W. & Baayen, R. P. Histology of  
567 pathogenesis of *Mycosphaerella graminicola* in wheat. *Phytopathology* vol. 7 777–786  
568 Preprint at <https://doi.org/10.1094/Phyto-86-777> (1996).
- 569 13. Shaw, M. W. Assessment of upward movement of rain splash using a fluorescent  
570 tracer method and its application to the epidemiology of cereal pathogens. *Plant*  
571 *Pathol* **36**, 201–213 (1987).
- 572 14. Brown, J. K. M., Chartrain, L., Lasserre-Zuber, P. & Saintenac, C. Genetics of  
573 resistance to *Zymoseptoria tritici* and applications to wheat breeding. *Fungal Genetics*  
574 *and Biology* vol. 79 33–41 Preprint at <https://doi.org/10.1016/j.fgb.2015.04.017> (2015).
- 575 15. Yang, N., McDonald, M. C., Peter, , Solomon, S. & Milgate, A. W. Genetic mapping of  
576 Stb19, a new resistance gene to *Zymoseptoria tritici* in wheat. *Theoretical and Applied*  
577 *Genetics* **1**, 3 (2018).
- 578 16. Langlands-Perry, C. *et al.* Resistance of the Wheat Cultivar ‘Renan’ to Septoria Leaf  
579 Blotch Explained by a Combination of Strain Specific and Strain Non-Specific QTL  
580 Mapped on an Ultra-Dense Genetic Map. *Genes (Basel)* **13**, 100 (2022).
- 581 17. Brading, P. A., Verstappen, E. C. P., Kema, G. H. J. & Brown, J. K. M. A Gene-for-Gene  
582 Relationship Between Wheat and *Mycosphaerella graminicola*, the Septoria Tritici  
583 Blotch Pathogen. *Phytopathology* **92**, 439–445 (2002).
- 584 18. Ghaffary, S. M. T. *et al.* New broad-spectrum resistance to septoria tritici blotch  
585 derived from synthetic hexaploid wheat. *Theoretical and Applied Genetics* **124**, 125–142  
586 (2012).
- 587 19. Arraiano, L. S. *et al.* A gene in European wheat cultivars for resistance to an African  
588 isolate of *Mycosphaerella graminicola*. *Plant Pathol* **56**, 73–78 (2007).

- 589 20. Arraiano, L. S. & Brown, J. K. M. Identification of isolate-specific and partial  
590 resistance to septoria tritici blotch in 238 European wheat cultivars and breeding lines.  
591 *Plant Pathol* **55**, 726–738 (2006).
- 592 21. Wingen, L. U. *et al.* Establishing the A. E. Watkins landrace cultivar collection as a  
593 resource for systematic gene discovery in bread wheat. *Theor Appl Genet* **127**, 1831–  
594 1842 (2014).
- 595 22. Winfield, M. O. *et al.* High-density genotyping of the A.E. Watkins Collection of  
596 hexaploid landraces identifies a large molecular diversity compared to elite bread  
597 wheat. *Plant Biotechnol J* **16**, 165–175 (2018).
- 598 23. Togninalli, M. *et al.* The AraGWAS Catalog: A curated and standardized Arabidopsis  
599 thaliana GWAS catalog. *Nucleic Acids Res* **46**, D1150–D1156 (2018).
- 600 24. Arora, S. *et al.* A wheat kinase and immune receptor form host-specificity barriers  
601 against the blast fungus. *Nat Plants* **9**, (2023).
- 602 25. Kema, G. H. J. *et al.* Variation for virulence and resistance in the wheat-  
603 Mycosphaerella graminicola pathosystem I. Interactions between pathogen isolates  
604 and host cultivars. *Phytopathology* vol. 86 213–220 Preprint at  
605 <https://doi.org/10.1094/Phyto-86-213> (1996).
- 606 26. Chartrain, L., Sourdille, P., Bernard, M. & Brown, J. K. M. Identification and location  
607 of Stb9, a gene for resistance to septoria tritici blotch in wheat cultivars Courtot and  
608 Tonic. *Plant Pathol* **58**, 547–555 (2009).
- 609 27. Amezrou, R. *et al.* A secreted protease-like protein in Zymoseptoria tritici is  
610 responsible for avirulence on Stb9 resistance gene in wheat. *PLoS Pathog* **19**, (2023).
- 611 28. Battache, M. *et al.* Blocked at the Stomatal Gate, a Key Step of Wheat Stb16q-Mediated  
612 Resistance to Zymoseptoria tritici. *Front Plant Sci* **13**, (2022).
- 613 29. Sun, Y., Qiao, Z., Muchero, W. & Chen, J. G. Lectin Receptor-Like Kinases: The Sensor  
614 and Mediator at the Plant Cell Surface. *Front Plant Sci* **11**, 1989 (2020).
- 615 30. Avni, R. *et al.* Genome sequences of three Aegilops species of the section Sitopsis  
616 reveal phylogenetic relationships and provide resources for wheat improvement.  
617 *Plant J* **110**, 179–192 (2022).
- 618 31. Bartoli, C. & Roux, F. Genome-Wide Association Studies In Plant Pathosystems:  
619 Toward an Ecological Genomics Approach. *Front Plant Sci* **8**, 763 (2017).
- 620 32. Chartrain, L., Brading, P. A. & Brown, J. K. M. Presence of the Stb6 gene for resistance  
621 to septoria tritici blotch (Mycosphaerella graminicola) in cultivars used in wheat-  
622 breeding programmes worldwide. *Plant Pathol* **54**, 134–143 (2005).
- 623 33. Steuernagel, B. *et al.* The NLR-Annotator Tool Enables Annotation of the Intracellular  
624 Immune Receptor Repertoire 1[OPEN]. (2020) doi:10.1104/pp.19.01273.
- 625 34. Wulff, B. B. H., Chakrabarti, A. & Jones, D. A. Recognition specificity and evolution  
626 in the tomato-Cladosporium fulvum pathosystem. *Molecular Plant-Microbe Interactions*  
627 **22**, 1191–1202 (2009).
- 628 35. Thomas, C. M., Dixon, M. S., Parniske, M., Golstein, C. & Jones, J. D. G. Genetic and  
629 molecular analysis of tomato Cf genes for resistance to Cladosporium fulvum.  
630 *Philosophical Transactions of the Royal Society B: Biological Sciences* **353**, 1413–1424 (1998).
- 631 36. Larkan, N. J. *et al.* The Brassica napus wall-associated kinase-like (WAKL) gene Rlm9  
632 provides race-specific blackleg resistance. *The Plant Journal* **104**, 892–900 (2020).
- 633 37. Larkan, N. J. *et al.* The Brassica napus blackleg resistance gene LepR3 encodes a  
634 receptor-like protein triggered by the Leptosphaeria maculans effector AVR1M1. *New*  
635 *Phytologist* **197**, 595–605 (2013).
- 636 38. Miyakawa, T. *et al.* A secreted protein with plant-specific cysteine-rich motif functions  
637 as a mannose-binding lectin that exhibits antifungal activity. *Plant Physiol* **166**, 766–  
638 778 (2014).
- 639 39. Burton, R. A. & Fincher, G. B. Evolution and development of cell walls in cereal  
640 grains. *Front Plant Sci* **5**, 456 (2014).



- 641 40. Singh, P. & Zimmerli, L. Lectin receptor kinases in plant innate immunity. *Front Plant*  
642 *Sci* **4**, 124 (2013).
- 643 41. Wang, Y. *et al.* Orthologous receptor kinases quantitatively affect the host status of  
644 barley to leaf rust fungi. *Nat Plants* **5**, 1129–1135 (2019).
- 645 42. van der Hoorn, R. A. L. & Kamoun, S. From Guard to Decoy: A New Model for  
646 Perception of Plant Pathogen Effectors. *THE PLANT CELL ONLINE* **20**, 2009–2017  
647 (2008).
- 648 43. Ma, L. S. *et al.* Maize Antifungal Protein AFP1 Elevates Fungal Chitin Levels by  
649 Targeting Chitin Deacetylases and Other Glycoproteins. *mBio* **14**, (2023).
- 650 44. Bouwmeester, K. *et al.* The Lectin Receptor Kinase LecRK-I.9 Is a Novel Phytophthora  
651 Resistance Component and a Potential Host Target for a RXLR Effector. *PLoS Pathog*  
652 **7**, e1001327 (2011).
- 653 45. Amezrou, R. *et al.* Whole-genome sequencing reveals diverse mechanisms underlying  
654 quantitative pathogenicity and host adaptation in a fungal plant pathogen. *bioRxiv*  
655 2022.12.23.521735 (2022) doi:10.1101/2022.12.23.521735.
- 656 46. Zhong, Z. *et al.* A small secreted protein in *Zymoseptoria tritici* is responsible for  
657 avirulence on wheat cultivars carrying the *Stb6* resistance gene. *New Phytologist* **214**,  
658 619–631 (2017).
- 659 47. Kema, G. H. J. *et al.* Stress and sexual reproduction affect the dynamics of the wheat  
660 pathogen effector AvrStb6 and strobilurin resistance. *Nat Genet* **1** (2018)  
661 doi:10.1038/s41588-018-0052-9.
- 662 48. Kolodziej, M. C. *et al.* A membrane-bound ankyrin repeat protein confers race-specific  
663 leaf rust disease resistance in wheat. *Nature Communications* 2021 12:1 **12**, 1–12 (2021).
- 664 49. Kema, G. H. J. & Van Silfhout, C. H. Genetic variation for virulence and resistance in  
665 the wheat-*Mycosphaerella graminicola* pathosystem III. Comparative seedling and  
666 adult plant experiments. *Phytopathology* **87**, 266–272 (1997).
- 667 50. Kema, G. H. J. *et al.* Genetic variation for virulence and resistance in the wheat-  
668 *Mycosphaerella graminicola* pathosystem I. Interactions Between Pathogen Isolates  
669 and Host Cultivars. *Phytopathology* **86**, 200–212 (1996).
- 670 51. Kema, G. H., Sayoud, R., Annone, J. G. & Van Silfhout, C. H. Genetic Variation for  
671 Virulence and Resistance in the Wheat-*Mycosphaerella graminicola* Pathosystem II.  
672 Analysis of Interactions Between Pathogen Isolates and Host Cultivars. *Phytopathology*  
673 vol. 86 213–220 Preprint at (1996).
- 674 52. Patterson, H. D. & Williams, E. R. A new class of resolvable incomplete block designs.  
675 *Biometrika* **63**, 83–92 (1976).
- 676 53. Arraiano, L. S., Brading, P. A. & Brown, J. K. M. A detached seedling leaf technique to  
677 study resistance to *Mycosphaerella graminicola* (anamorph *Septoria tritici*) in wheat.  
678 *Plant Pathol* **50**, 339–346 (2001).
- 679 54. Kuznetsova, A., Brockhoff, P. B. & Christensen, R. H. B. lmerTest Package: Tests in  
680 Linear Mixed Effects Models. *J Stat Softw* **82**, (2017).
- 681 55. McGrann, G. R. D. *et al.* A trade off between mlo resistance to powdery mildew and  
682 increased susceptibility of barley to a newly important disease, *Ramularia* leaf spot. *J*  
683 *Exp Bot* **65**, 1025–1037 (2014).
- 684 56. Collett, D. *Modelling binary data BT - Texts in statistical science.* (Chapman &  
685 Hall/CRC, 2003).
- 686 57. Lenth, Russel., Love, Jonathon. & Herve, Maxime. Estimated Marginal Means, aka  
687 Least-Squares Means. *R J* (2018).
- 688 58. R Core Team. R: A language and environment for statistical computing. *International*  
689 *journal of antimicrobial agents* vol. 41 Preprint at <https://www.R-project.org/> (2022).
- 690 59. Kolde, R. Package `pheatmap`. *Bioconductor* (2012).
- 691 60. Wickham, H. Package `ggplot2`: Elegant Graphics for Data Analysis. *Springer-Verlag*  
692 *New York* (2016).

- 693 61. Wilke, C. O. cowplot: Streamlined Plot Theme and Plot Annotations for 'ggplot2'. R  
694 package version 0.7.0. URL: <https://CRAN.R-project.org/package=cowplot>. Accessed 18  
695 October 2018 (2016).
- 696 62. Kahle, D. & Wickham, H. ggmap: Spatial Visualization with ggplot2. [https://journal.r-](https://journal.r-project.org/archive/2013-1/kahle-wickham.pdf)  
697 [project.org/archive/2013-1/kahle-wickham.pdf](https://journal.r-project.org/archive/2013-1/kahle-wickham.pdf).
- 698 63. Knaus, B. J. & Grünwald, N. J. vcfr: a package to manipulate and visualize variant call  
699 format data in R. in *Molecular Ecology Resources* vol. 17 (2017).
- 700 64. Oksanen, J. *et al.* Vegan: Community Ecology Package. R package version 2.5-7.  
701 *Community ecology package* **10**, (2020).
- 702 65. Li, H. Aligning sequence reads, clone sequences and assembly contigs with BWA-  
703 MEM. *arXiv preprint arXiv* (2013).
- 704 66. Danecek, P. *et al.* Twelve years of SAMtools and BCFtools. *Gigascience* **10**, (2021).
- 705 67. Jumper, J. *et al.* Highly accurate protein structure prediction with AlphaFold. *Nature*  
706 **596**, (2021).
- 707 68. Paysan-Lafosse, T. *et al.* InterPro in 2022. *Nucleic Acids Res* **51**, (2023).
- 708 69. Altschul, S. F., Gish, W., Miller, W., Myers, E. W. & Lipman, D. J. Basic local  
709 alignment search tool. *J Mol Biol* **215**, (1990).
- 710 70. Edgar, R. C. MUSCLE: Multiple sequence alignment with high accuracy and high  
711 throughput. *Nucleic Acids Res* **32**, (2004).
- 712 71. Kalyanamoorthy, S., Minh, B. Q., Wong, T. K. F., Von Haeseler, A. & Jermin, L. S.  
713 ModelFinder: fast model selection for accurate phylogenetic estimates. *Nature Methods*  
714 *2017 14:6* **14**, 587–589 (2017).
- 715 72. Nguyen, L. T., Schmidt, H. A., Von Haeseler, A. & Minh, B. Q. IQ-TREE: A Fast and  
716 Effective Stochastic Algorithm for Estimating Maximum-Likelihood Phylogenies. *Mol*  
717 *Biol Evol* **32**, 268–274 (2015).
- 718 73. Hoang, D. T., Chernomor, O., Von Haeseler, A., Minh, B. Q. & Vinh, L. S. UFBoot2:  
719 Improving the Ultrafast Bootstrap Approximation. *Mol Biol Evol* **35**, 518–522 (2018).
- 720 74. Letunic, I. & Bork, P. Interactive Tree Of Life (iTOL) v5: an online tool for  
721 phylogenetic tree display and annotation. *Nucleic Acids Res* **49**, W293–W296 (2021).
- 722 75. International Wheat Genome Sequencing Consortium (IWGSC), T. I. W. G. S. C. *et al.*  
723 Shifting the limits in wheat research and breeding using a fully annotated reference  
724 genome. *Science* **361**, eaar7191 (2018).
- 725  
726

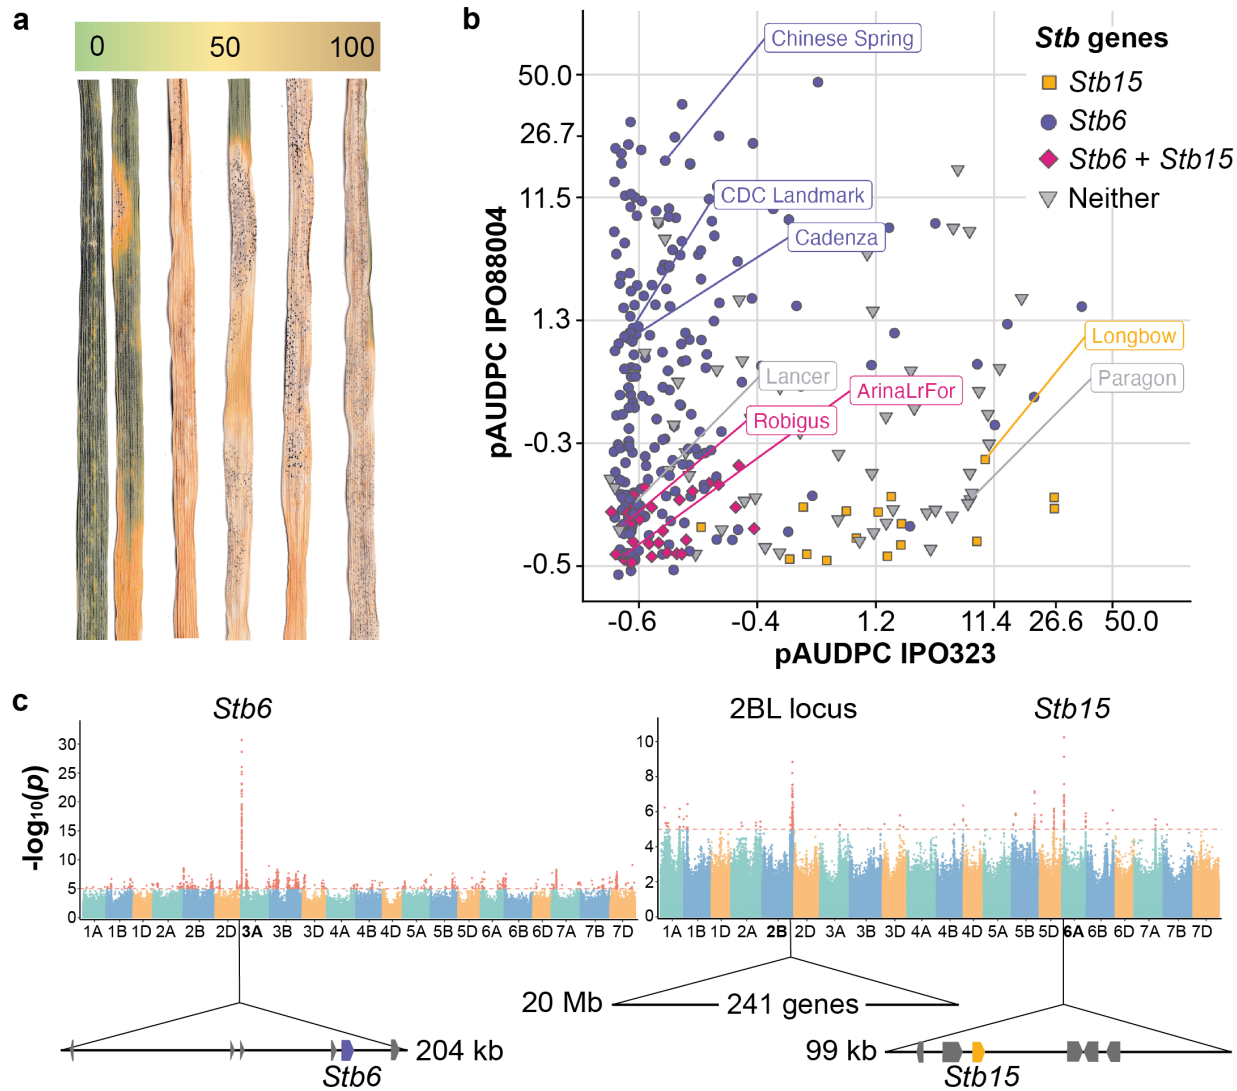

727

728 **Fig. 1: Race-specific resistance to *Z. tritici* in the wheat Watkins landrace panel associates**  
 729 **with discrete disequilibrium blocks.** **a**, Quantitative variation in pycnidia and necrosis  
 730 phenotypes. Pictured are leaves arranged by pycnidia coverage. **b**, Effects of *Stb6* and *Stb15*  
 731 on resistance to *Z. tritici* isolates IPO88004 and IPO323. **c**, Manhattan plots showing the  
 732 association of logit pAUDPC response to *Z. tritici* isolates IPO323 (left) and IPO88004 (right)  
 733 with SNPs mapped to Chinese Spring. Linkage disequilibrium (LD) blocks associated with  
 734 STB resistance are drawn as arrows beneath the chromosomes (marked in bold) with the 6A  
 735 *Stb15* candidate gene marked in orange and *Stb6* marked in purple.

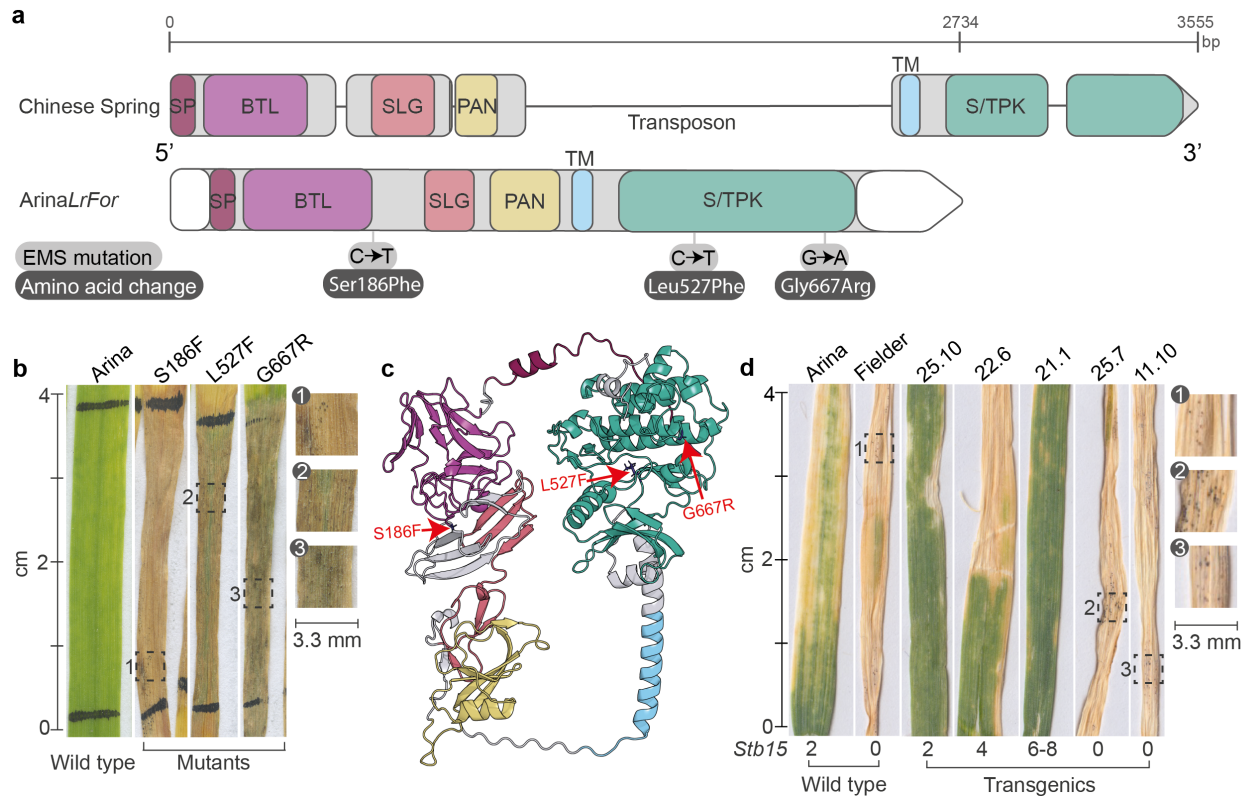

736

737

738

739

740

741

742

743

744

745

746

747

748

749

750

**Fig. 2: Structure and function of *Stb15*.** **a, b, a,b** The functional resistance allele of *Stb15* in wheat cv. Arina and ArinaLrFor compared to the susceptible allele in cv. Chinese Spring. The predicted exons and introns are shown as rounded rectangles and lines, respectively, for Chinese Spring (RefSeq v1.175) and ArinaLrFor (see Methods). Domains are highlighted: SP = signal peptide, BTL = bulb-type lectin, SLG = S-locus glycoprotein, PAN = plasminogen/apple/nematode, TM = transmembrane, S/TPK = Serine/Threonine Protein Kinase. White boxes indicate untranslated regions (UTRs). The sequence and phenotype of three EMS-induced loss-of-function mutants inoculated with *Z. tritici* isolate IPO88004 are indicated. **c**, AlphaFold-augmented 3D structural model of Stb15. The domains are coloured as in panel a. The location of the three EMS-induced mutations are indicated by dark blue colouring and red arrows with labels. **d**, Cultivar Fielder stably transformed with an *Stb15* construct and inoculated with isolate IPO88004. 25.7 is a null wherein the transgene segregated out in the T<sub>2</sub> family whilst 11.10 was transformed with the same vector backbone minus *Stb15*. Copy number of *Stb15* (*Stb15*) is given as a fixed number or range.

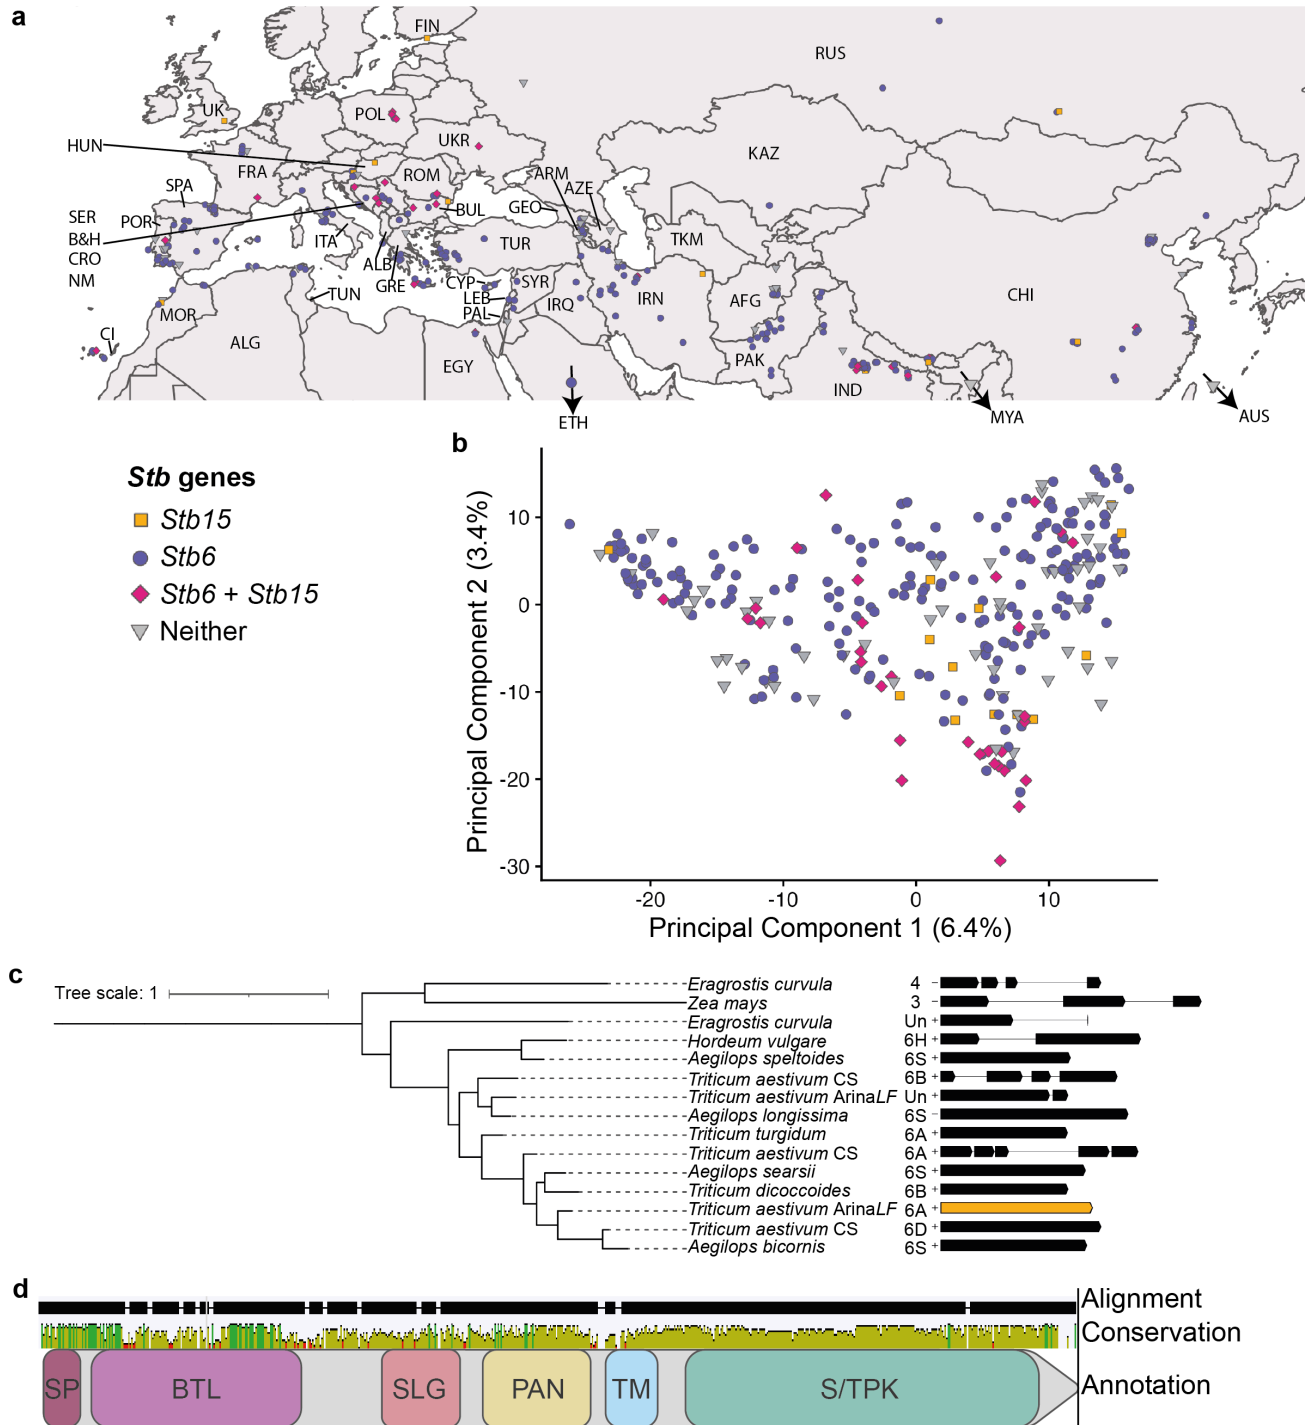

751

752 **Fig. 3: Geographic distribution and intra- and inter-species structural diversity of *Stb15*. a,**

753 Distribution of *Stb6* and *Stb15* in the Watkins 300 core collection. The map indicates

754 coordinates of markets from which landraces were collected. Only countries from which

755 landraces were collected are labelled. Country abbreviations are expanded in **Supp. Text 1**.

756 **b**, Principal Component Analysis (PCA) plot of 300 Watkins landraces with lines containing

757 predicted functional alleles of *Stb6* (purple), *Stb15* (orange), both (pink) or neither (grey)

758 indicated. **c**, Maximum likelihood phylogenetic tree of proteins with homology to the

759 *ArinaLrFor* (*ArinaLF*) *Stb15*-encoded allele from selected Poaceae species, including the

760 wheat reference genome Chinese Spring (CS). The smallest non-repetitive ('inner') clade

761 containing *Stb15* is shown. The intron/exon structure of *Stb15* homologs and their relative

762 nucleotide lengths are presented (arrow = exon coding sequence, line = intron). Species  
763 names and chromosomes are given; Un indicates homologs within scaffolds which have not  
764 yet been mapped to chromosomes. Gene IDs for homologs are given in **Supp. Table 14. d**,  
765 Protein alignment of the homologs from **panel c** with alignment gaps, sequence  
766 conservation and predicted protein domains indicated. Taller, greener bars in the  
767 conservation panel indicate more conserved regions.
